# Supplementary material for: Seasonality in Human Interest in Berry Plants Detection by Google Trends
Source: Frontiers journal article supplement (doi:10.3389/ffgc.2021.688835), 2021-09-01
Supplement: Data_Sheet_2.xlsx [file Data_Sheet_2.xlsx]

## Sheet: Table S1
	Table S1. Related queries for given keyword with the limited topic “Plants” (search topics option) (score > 20)
	English translation is given in ().
	(a) Russia
	Lingonberry (Plants)		Cranberry (Plants)		Bog bilberry (Plants)		European blueberry (Plants)		Currant (Plants)		Ribes uva-crispa (Plants)		Cloudberry (Plants)		Raspberry (Fruit)		Honeysuckle (Plants)		Sea buckthorn (Plants)
	брусника (ligonberry)	100	клюква (cranberry)	100	голубика (bilberry)	100	черника (blueberry)	100	смородина (currant)	100	крыжовник (gooseberry)	100	морошка (cloudberry)	100	raspberry	100	жимолость (honeysuckle)	100	облепиха (sea buckthorn)	100
	брусники (linginberries)	52	клюквенный (of cranberry; adjective)	30					из красной смородины (red currant)	40	из крыжовника (of gooseberry)	78			raspberry pi	21	жимолости (honey suckles)	31	облепиховое масло (sea buckthorn oil)	83
	брусничный (of lingonberry; adjective)	34	морс (berry drink)	29					черная смородина (black currant)	29	варенье (preserve)	46							из облепихи (of sea buckthorn)	29
									варенье (preserve)	28	варенье из крыжовника (gooseberry preserve)	42
									желе из смородины (currant jelly)	25
									варенье из смородины (currant preserve)	24
	(b) Finland
	Lingonberry (Plants)		Cranberry (Plants)		Bog bilberry (Plants)		European blueberry (Plants)		Currant (Plants)		Ribes uva-crispa (Plants)		Cloudberry (Plants)		Raspberry (Fruit)		Honeysuckle (Plants)		Sea buckthorn (Plants)
	puolukka (lingonberry)	100	karpalo (cranberry)	100	juolukka (bilberry)	100	mustikka (blueberry)	100	herukka (currant)	100	karviainen (gooseberry)	100	lakka (lacquer)	100	raspberry	100	kuusama (honeysuckle)	100	buckthorn	100
			cranberry	28					currant	55			hilla (clondberry)	87	raspberry pi	21	honeysuckle	27	sea buckthorn	73
									black currant	36			cloudberry	37			lonicera	25
									viinimarja (grape)	25
	(c) Canada
	Lingonberry (Plants)		Cranberry (Plants)		Bilberry (Plants)		Blueberry (Berry)		Currant (Plants)		Ribes uva-crispa (Plants)		Cloudberry (Plants)		Raspberry (Fruit)		Honeysuckle (Plants)		Sea buckthorn (Plants)
	lingonberry	100	cranberry	100	bilberry	100	blueberry	100	currant	100	gooseberry	100	bakeapple	100	raspberry	100	honeysuckle	100	buckthorn	100
	partridge berry	30			myrtille	79	blueberries	29	black currant	56	gooseberries	25	cloudberry	58	framboise	25			sea buckthorn	90
					myrtilles	25	muffins	23	ribes	27			cloudberries	41	raspberries	21			buckthorn oil	32
							blueberry muffins	23	red currant	23			chicoutai (cloud berry; in French)	37					sea buckthorn oil	30
													cloud berry	26					seabuckthorn	25
													bakeapples	26
													chicouté (cloud berry; in French)	21

## Sheet: Table S2
	Table S2. Related queries for given keyword (Russian keywords) (search term option) (score > 20)
	English transration is given in ( ), and additional note in [ ]
	брусника (lingonberry)		клюква (cranberry)		голубика (bog bilberry)		черника (European blueberry)		смородина (currant)		крыжовник (gooseberry)		морошка (cloudberry)		малина (raspberry)		жимолость (honeysuckle)		облепиха (sea buckthorn)
	клюква (cranberry)	100	брусника (lingonberry)	100	черника (blueberry)	100	черника форте [trade name]	100	смородина черная (black currant)	100	крыжовник чехов (gooseberry Chekhov) [literature]	100	морошка уфа [restaurant]	100	рязань малина (Ryazan raspberry) [shopping mall in Ryazan city ]	100	жимолость фото (honeysuckle photo)	100	облепиха польза (sea buckthorn benefit)	100
	брусника екатеринбург (lingonberry Ekaterinburg) [company]	83	клюква банк [bank]	86	голубика черника (bilberry blueberry)	92	голубика черника (bilberry blueberry)	98	красная смородина (red currant)	64	чехов (Chekhov)	97	морошка фото (cloudberry photo)	68	малина ягода (raspberry berry)	89	жимолость каприфоль [honeysuckle variety]	61	облепиха свойства (sea buckthorn properties)	90
	брусника польза (lingonbery benefit)	48	клюква польза (cranberry benefit)	62	голубика фото (bilberry photo)	40	голубика (bilberry)	94	газ смородина [company]	25	крыжовник краткое (gooseberry shortstory) [literature]	60	ягода морошка (berry cloudberry)	67	малина липецк (raspberry Lipetsk) [cinema in Lipetsk city]	88	жимолость сорта (honeysuckle varieties)	48	облепиха сиберика [trade name]	79
	брусника фото (lingonberry photo)	47	клюква в сахаре (cranberry in sugar) [kind of candies]	50	черника и голубика (blueberry and bilberry)	33	черника фото (blueberry photo)	49			краткое содержание крыжовник (summary of gooseberry) [literature]	54	морошка купить (cloudberry buy)	37	малина кинотеатр (raspberry cinema)	73	жимолость польза (honeysuckle benefit)	46	облепиха купить (sea buckthorn buy)	65
	брусника кафе (lingonberry cafe) [restaurant]	43	клюква фото (cranberry photo)	47	голубика садовая (garden bilberry)	29	ягода черника (berry blueberry)	36			человек в футляре [literature]	38	ресторан морошка (restraunt cloudberry)	27	калина малина [trade name, song]	49	жимолость купить (honeysuckle buy)	46	облепиха полезные свойства (sea buckthorn benefit properties)	58
	брусника жк (lingonberry jk) [company]	41	клюква онлайн [bank]	42	голубика ягода (bilberry berry)	26	черника купить (blueberry buy)	35			о любви чехов [literature]	26	брусника (lingonberry)	26	малина ремонтантная [raspberry variety]	47	жимолость съедобная (honeysuckle edible)	38	облепиха фото (sea buckthorn photo)	55
	брусника моченая (soused lingonberry)	38	клюква цена (cranberry price)	38	голубика польза (bilberry benefit)	25	черника и голубика (blueberry and biliberry)	32			крыжовник чехов краткое [literature]	24			малина фото (raspberry photo)	41	жимолость ягода (honeysuckle berry)	30	облепиха казань (sea buckthorn Kazan)	54
	брусника на зиму (lingonberry for winter)	32	клюква пермь [bank]	34	голубика купить (bilberry buy)	24	рем дигга черника [singer]	31			краткое содержание чехов крыжовник [literature]	22			люксор [cinema in Ryazan city]	36	жимолость посадка (honeysuckle planting)	28	облепиха на зиму (sea buckthorn for winter)	49
	черника (blueberry)	31	клюква при беременности (cranberry during pregnancy)	34			рем дигга [singer]	30			крыжовник варенье (gooseberry preserve)	22			малина расписание (raspberry schedule)	36	жимолость ягоды (honeysuckle berries)	28	облепиха для волос (sea buckthorn for hair)	48
	брусника купить (lingonberry buy)	29	клюква мебель (cranberry furniture) [company]	33			черника польза (blueberry benefit)	28			крыжовник читать (goooseberry read)	21			люксор рязань [cinema in Ryazan city]	34	жимолость уход (honeysuckle care)	27	облепиха рецепты (sea buckthorn recipes)	47
	брусника свойства (lingonberry properties)	29	клюква свойства (cranberry properties)	31			брусника (lingonberry)	28			чехов человек в футляре [literature]	21			малина рязань кинотеатр (raspberry Ryazan cinema)	33	жимолость это (what is honeysuckle)	25	облепиха с сахаром (sea buckthorn with sugar)	42
	брусника с сахаром (lingonberry with sugar)	27	клюква аптека [shop]	30			малина (raspberry)	26							золотая малина (golden raspberry) [cinema award]	33	жимолость свойства (honeysuckle properties)	25	облепиха чем полезна (sea buckthorn what benefit)	41
	брусника магазин (lingonberry shop)	26	клюква с сахаром (cranberry with sugar)	30			ежевика (blackberry)	22							черная малина (black raspberry)	30			натура сиберика облепиха [trade name]	33
	брусника урал (lingonberry Ural)	25	клюква бар [restaurant]	27			черника на зиму (blueberry for winter)	21							малина карта (raspberry card)	30			облепиха рецепт (sea buckthorn recipe)	33
	брусника и клюква (lingonberry and cranberry)	24	клюква давление (cranberry blood pressure)	25											карта малина (card raspberry)	29			облепиха варенье (sea buckthorn preserve)	31
	брусника москва (lingonberry Moscow)	24	клюква сушеная (dried cranberry)	24											малина это (what is raspberry)	28			облепиха при беременности (sea buckthorn during pregnancy)	29
	во бору брусника (in lingonberry forest) [film]	24	калина (viburnum)	23											малина с сахаром (raspberry with sugar)	28			облепиха польза и вред (sea buckthorn benefit and harm)	25
	брусника при беременности (lingonberry during pregnancy)	24	клюква и брусника (cranberry and lingonberry)	22											клубника (strawberry)	27			облепиха дерево (sea buckthorn tree)	21
	брусника застройщик (lingonberry developer) [buiding company]	22													малина москва (raspberry Moscow)	26			облепиха крушиновидная (sea buckthorn)	21
	поспевает брусника (lingonberry ripens) [verse]	21													малина бар (raspberry bar)	24
															малина кино (raspberry cinema)	23
															малина сорта (raspberry varieties)	23
															малина уход (raspberry care)	23
															кафе малина (café raspberry)	21

## Sheet: Table S3
	Table S3. Related topics for given keyword with the limited topic “Plants” (search topics option) (score > 20)
	(a) Russia
	Lingonberry (Plants)		Cranberry (Plants)		Bog bilberry (Plants)		European blueberry (Plants)		Currant (Plants)		Ribes uva-crispa (Plants)		Cloudberry (Plants)		Raspberry (Fruit)		Honeysuckle (Plants)		Sea buckthorn (Plants)
	Leaf	100	Mors	100	European blueberry	100	Pie	100	Blackcurrant	100	Varenye	100	Berry	100	Red raspberry	100	Cultivar	100	Oil	100
	Pie	81	Lingonberry	36	Berry	41	Bog bilberry	70	Redcurrant	69	Currant	41	Varenye	59	Raspberry Pi	86	Varenye	84	Sea buckthorn oil	99
	Cranberry	60	Sauce	25	Cultivar	26	Varenye	60	Varenye	34			Cranberry	24	Berry	23	Lonicera caprifolium	67	Tea	23
	Mors	56	Sugar	23			Berry	57	Gelatin dessert	28			Lingonberry	22			Berry	58
	Sauce	55					Lingonberry	27					Vodka	22			Lonicera edulis	53
	Gestation	43					Winter	24									Pruning	45
	Varenye	36					Blueberry pie	22									Berry	45
	Berry	30					Sugar	21									Reproduction	44
	Winter	28					Red raspberry	21									Shrub	40
	Apple	26															Currant	38
																	Plants	33
																	Property	33
																	Spring	24
																	Red raspberry	22
																	transplant	21
																	Autumn	21
	(b) Finland
	Lingonberry (Plants)		Cranberry (Plants)		Bog bilberry (Plants)		European blueberry (Plants)		Currant (Plants)		Ribes uva-crispa (Plants)		Cloudberry (Plants)		Raspberry (Fruit)		Honeysuckle (Plants)		Sea buckthorn (Plants)
	European blueberry	100	Lingonberry	100	Crowberry	100	Blueberry pie	100	Redcurrant	100	Karkkila	100	Lacquer	100	Raspberry Pi	100	Shrub	100	Buckthorn	100
	Vispipuuro	50	Long drink	82	European blueberry	91	Cheesecake	72	Blackcurrant	78	Nummela	87			Red raspberry	38	Berry	82	Seaberry	28
	Pie	40	Dried cranberry	76	Lingonberry	60	White chocolate	59			Vihti	82					Fly honeysuckle	73
	Russian candy	39	Lonkero	69	Vaccinium	34	Pie	58			Dentist	47					Tatarian honeysuckle	64
	Cheesecake	37	Russian candy	68	Marsh Labrador Tea	26	Lingonberry	56			Currant	47					Flower	55
	Cranberry	36	Recipe	61	Calluna	26	Muffin	52			planting	43					Toxicity	46
	Calluna	31	White chocolate	58	Cranberry	21	Strawberries	48			Blackcurrant	36					Kuusamo	45
	Cake	23	Cheesecake	52	Berry	21	Smoothie	48			Food freezing	32					Lonicera caprifolium	36
	Berry	22	Cookie	46	Common juniper	21	Red raspberry	40			Red raspberry	32					Alder buckthorn	36
	Red raspberry	22	Cocktail	43			Calorie	30			Berry	28					Lonicera xylosteum	27
	Dessert	21	Urinary tract infection	39			Quark	29			Vitamin	28					Filipendula	27
			Cranberry juice	36			Cake	29			Redcurrant	27					Plants	27
			Berry	33			Berry	29			Food preservation	27					Kamchatka honeysuckle	27
			Vodka	33			Food freezing	23									Vine	27
			European blueberry	31
			Skruf Snus	31
			Dessert	26
			Warfarin	26
			Cake	24
			Juice	22
			Cloudberry	22
			Health	21
	(c) Canada
	Lingonberry (Plants)		Cranberry (Plants)		Bilberry (Plants)		Blueberry (Plants)		Currant (Plants)		Ribes uva-crispa (Plants)		Cloudberry (Plants)		Raspberry (Fruit)		Honeysuckle (Plants)		Sea buckthorn (Plants)
	Berry	100	Recipe	100			Muffin	100	Blackcurrant	100	Berry	100	Newfoundland and Labrador	100	Recipe	100	Vine	100	Buckthorn	100
	Recipe	58	Sauce	86			Recipe	79	Redcurrant	37	Indian gooseberry	63	Berry	94	Muffin	47	Flower	73	Oil	50
	Jam	48	Cranberry sauce	86			Blueberry Muffin	43			Jam	43	Jam	91	Cake	39	Plants	72	Sea buckthorn oil	47
	Muffin	43	Juice	77			Blueberry pie	25			Shrub	40	MSP360	59	Ketone	39	Shrub	65
	Cranberry	38	Cranberry juice	70			Cake	23			Fruit	36	Apple	38	Raspberry ketone	34	Tree	38
	European blueberry	26	Muffin	47			Banana	23			Peruvian groundcherry	31	Baking	38	Tea	33	Fly honeysuckle	27
	Blueberry	21	Salad	29							Currant	28	Cheesecake	35	Jam	32	Leaf	25
			Orange	25							Kiwifruit	24	Fruit	29	Red raspberry leaf	32	Pruning	23
			Cookie	22							Plants	23	Brambles	29	Chocolate	32	Tatarian honeysuckle	21
			Dried cranberry	21									Liquor	21	Raspberry Pi	29	Japanese honeysuckle	21

## Sheet: Table S4
	Table S4. Monthly-based related topics for given keyword with the limited topic “Plants” (search topics option). Numbers of the corresponding months are noted in parentheses
	(a) Russia
		Lingonberry (Plants)		Cranberry (Plants)		Bog bilberry (Plants)		European blueberry (Plants)		Currant (Plants)		Ribes uva-crispa (Plants)		Cloudberry (Plants)		Raspberry (Fruit)		Honeysuckle (Plants)		Sea buckthorn (Plants)
	Jan	Sauce (3), Pie (2), Mors (2), Leaf (1)		Mors (8)		European blueberry (3)		Pie (4), Bog bilberry (1), Eye (1)		Blackcurrant (8)		Berry (1), Word (1)		Berry (1)		Red raspberry (2), Raspberry Pi (1)		Shrub (1), Photography (1)		Sea buckthorn oil (6), Oil (2)
	Feb	Pie (3), Leaf (3), Mors (1), Cranberry (1)		Mors (7), Lingonberry (1)		European blueberry (3)		Pie (4), Torte (1), Berry (1), Eye (1)		Blackcurrant (9)		Currant (2), Word (2), Cultivar (1)		Berry (2)		Red raspberry (3), Raspberry Pi (1)		Tatarian honeysuckle (1）		Oil (5), Sea buckthorn oil (1)
	Mar.	Leaf (4), Pie (2), Sauce (1), Recipe (1)		Mors (7), Recipe (1), Nalewka (1)		European blueberry (4), Berry (1)		Pie (2), Bog bilberry (2), Berry (2), Eye (1), Vitamine (1)		Blackcurrant (8)		Currant (4), Spring (2), Pruning (1)				Red raspberry (1), Raspberry Pi (1)		Berry (1), Plants (1), Spring (1), Leather flower (1), Lonicera caprifolium (1), Cultivar (1), Photography (1),		Oil (3), Sea buckthorn oil (2)
	Apr.	Leaf (4), Mors (2), Pie (1), Gestation (1)		Mors (9)		European blueberry (3), Highbush blueberry (1), Cultivar (1), Landing (1)		Pie (2), Bog bilberry (2), Berry (2)		Blackcurrant (6), Spring (3)		Currant (2), Spring (2), Cultivar (1), Gooseberries (1), Anton Chekhov (1), The Man in a Case (1)				Red raspberry (2), Raspberry Pi (1)		Cultivar (5), Lonicera edulis (1), Landing (1)		Oil (7), Sea buckthorn oil (2)
	May	Leaf (5), Cranberry (2), Pie (1), Gestation (1)		Mors (8)		European blueberry (4), Cultivar (1)		Bog bilberry (3), Pie (1), Berry (1)		Blackcurrant (9)		Spring (2), Anton Chekhov (2), The Man in a Case (2), Cultivar (1), Powdery mildew (1),		Berry (1)		Raspberry Pi (3), Red raspberry (1)		Cultivar (4), Lonicera caprifolium (2), Landing (1), Disease (1)		Sea buckthorn oil (4), Oil (2)
	June	Leaf (8), Pie (2)		Mors (4), Lingonberry (1)		European blueberry (5), Leaf (1)		Bog bilberry (3), Berry (2), Pie (1), Recipe (1), Leaf (1)		Blackcurrant (9), Redcurrant (1)		Varenye (6), Currant (2), Leaf (1)		Berry (1)		Red raspberry (6), Raspberry Pi (2)		Varenye (8), Berry (2)		Oil (5), Sea buckthorn oil (3)
	July	Leaf (5), Mors (2)		Mors (6), Lingonberry (1)		European blueberry (7)		Varenye (5), Pie (2), Recipe (2)		Blackcurrant (7), Redcurrant (3)		Varenye (10)		Varenye (7), Winter (1)		Red raspberry (8), Calorie (1)		Varenye (8), Lonicera caprifolium (1), Cultivar (1)		Oil (7), Sea buckthorn oil (1)
	Aug.	Varenye (4), Recipe (3), Winter (2), Cranberry (1)		Mors (5), Lingonberry (2)		European blueberry (6), Varenye (1)		Varenye (5), Pie (4), Winter (1)		Blackcurrant (7), Redcurrant (3)		Varenye (10)		Berry (3), Varenye (2), Photography (1)		Red raspberry (3), Raspberry Pi (2)		Cultivar (2), Plants (1), Shrub (1), Landing (1), Autumn (1)		Oil (6), Sea buckthorn oil (3), Varenye (1)
	Sep.	Varenye (4), Recipe (2), Winter (1), Cranberry (1), Pie (1), Leaf (1)		Mors (8), Suger (1), Pregnancy (1)		European blueberry (4)		Bog bilberry (2), Pie (2), Berry (1), Lingonberry (1), Recipe (1)		Blackcurrant (9)		Currant (3), Gooseberries (2), Autumn (1), Varenye (1), Anton Chekhov (1), The Man in a Case (1)		Berry (1), Cranberry (1)		Raspberry Pi (3), Red raspberry (2)		Cultivar (3), Autumn (2)		Oil (4), Sea buckthorn oil (3), Varenye (2), Recipe (1)
	Oct.	Cranberry (6), Recipe (1), Pie (1), Leaf (1)		Mors (8), Suger (1), Recipe (1)		European blueberry (4), Pigeon (1), Recipe (1)		Pie (5), Berry (2), Bog bilberry (1)		Blackcurrant (9), Redcurrant (1)		Currant (2), Prung (2), Gooseberries (1), Winter (1)		Lingonberry (1)		Red raspberry (4), Raspberry Pi (2), Berry (1)		Autumn (3)		Sea buckthorn oil (6), Oil (4)
	Nov.	Pie (4), Mors (3), Leaf (2), Cranberry (1)		Mors (8), Recipe (2)		European blueberry (3)		Pie (4), Bog bilberry (1), Red raspberry (1), Recipe (1)		Blackcurrant (8), Pie (1)		Autumn (1), Gooseberries (1), Anton Chekhov (1), Word (1)		Berry (2)		Red raspberry (1), Raspberry Pi (1)		Shrub (1), Pruning (1)		Sea buckthorn oil (6), Oil (3)
	Dec.	Sauce (3), Pie (2), Mors (2), Leaf (1)		Mors (9), Sauce (1)		European blueberry (2), Olga Voronets (1)		Pie (3), Bog bilberry (1), Berry (1), Leaf (1)		Blackcurrant (8), Gas (1)		Currant (1), Gooseberries (1), Word (1), goal-like entity (1), Lilac (1)		Berry (1), Tundra (1)		Red raspberry (2), Raspberry Pi (1)		Photography (1)		Oil (6), Sea buckthorn oil (2)
	(b) Finland
		Lingonberry (Plants)		Cranberry (Plants)		Bog bilberry (Plants)		European blueberry (Plants)		Currant (Plants)		Ribes uva-crispa (Plants)		Cloudberry (Plants)		Raspberry (Fruit)		Honeysuckle (Plants)		Sea buckthorn (Plants)
	Jan							White chocolate (1), Smoothie (1)						Lacquer (2)		Raspberry Pi (3)		NA		NA
	Feb	Russian candy (1)						Blueberry pie (1), White chocolate (1)						Lacquer (1)		Raspberry Pi (2), Liquorice (1)
	Mar.	European blueberry (1)						Muffin (2), Red raspberry (1), Blueberry pie (1), Smoothie (1)								Raspberry Pi (1)
	Apr.							Smoothie (2), Red raspberry (1), Lingonberry (1), Cheesecake (1)						Lacquer (1)		Raspberry Pi (1)
	May							Cheesecake (3), Red raspberry (1), Flower (1), Blueberry pie (1), Cake (1), White chocolate (1)		Redcurrant (1)				Lacquer (2)		Raspberry Pi (1)
	June	European blueberry (3)						White chocolate (2), Lingonberry (1), Ripeninng (1), Pie (1), Cheesecake (1)		Redcurrant (1), Blackcurrant (1)				Lacquer (1), Blossom (1)		Raspberry Pi (1)
	July	European blueberry (2)		Cloudberry (1)		Crowberry (1)		Blueberry pie (5), Price (4), Ripening (1)		Redcurrant (1), Blackcurrant (1), Leaf (1)				Lacquer (3)		Raspberry Pi (3), Raspberry ketone (1), Liquorice (1)
	Aug.	European blueberry (1), Cranberry (1), Price (1), Ripening (1), Vispipuuro (1)				Crowberry (2), European blueberry (1)		Blueberry pie (4), Lingonberry (2), Red raspberry (1), Cheesecake (1), Recipe (1)		Redcurrant (4), Blackcurrant (1)		Recipe (4), Food freezing (1)		Lacquer (4)
	Sep.	European blueberry (2), Lingonberry jam (2), Pie (2), Price (2), Recipe (1)		Lingonberry (1)				Lingonberry (6), Blueberry pie (2)		Redcurrant (1), Blackcurrant (1)				Lacquer (3)
	Oct.	Crowberry (1), Pie (1), Recipe (1), Russian candy (1)		Dried cranberry (1), Cranberry juice (1)				Lingonberry (1), Blueberry pie (1), Muffin (1), White chocolate (1)						Lacquer (1)
	Nov.	Cheesecake (2), Russian candy (1), White chocolate (1)		Sprite (1)				Cheesecake (2), Strawberry (1), Blueberry pie (1), White chocolate (1)								Raspberry Pi (2)
	Dec.	Cheesecake (3), Dessert (1), Banoffee pie (1)		Russian candy (3), White chocolate (2)				Cheesecake (3), Cake (1), Chocolate (1)						Lacquer (1)		Ketone (1)
	(c) Canada
		Lingonberry (Plants)		Cranberry (Plants)		Bilberry (Plants)		Blueberry (Plants)		Currant (Plants)		Ribes uva-crispa (Plants)		Cloudberry (Plants)		Raspberry (Fruit)		Honeysuckle (Plants)		Sea buckthorn (Plants)
	Jan			Recipe (5), Juice (5)				Muffin (10)		Blackcurrant (2)						Recipe (4), Ketone (2), Tea (2), Red raspberry leaf (1), Chocolate (1)				Buckthorn (8)
	Feb	Muffin (1)		Recipe (3), Juice (3), Cranberry juice (2), Muffin (2)				Muffin (9), Recipe (1)		Blackcurrant (6)						Recipe (4), Muffin (2), Ketone (2), Raspberry ketone (1), Cake (1)		Japanese honeysuckle (1), Flower (1)		Buckthorn (5)
	Mar.			Juice (4), Cranberry juice (3), Recipe (3)				Muffin (10)		Blackcurrant (3)		Indian gooseberry (1)				Recipe (6), Muffin (2), Ketone (2)		Plants (1)		Buckthorn (5), Sea buckthorn oil (1)
	Apr.			Juice (4), Cranberry juice (3), Recipe (3)				Muffin (9), Recipe (1)		Blackcurrant (4), Shrub (1)		Indian gooseberry (1), Berry (1), Fruit (1)		Newfoundland and Labrador (1)		Recipe (4), Ketone (2), Red raspberry leaf (1), Plant (1), Cake (1), Muffin (1)		Plants (3), Shrub (1), Flower (1), Vine (1), Pruning (1)		Buckthorn (3)
	May			Juice (6), Cranberry juice (2), Recipe (2)				Muffin (10)		Blackcurrant (5)		Currant (1), Shrub (1)				Recipe (4), Ketone (2), Plants (1), Shrub (1), Muffin (1), Raspberry Pi (1)		Vine (5), Plants (2), Shrub (1), Flower (1)		Buckthorn (4), Sea buckthorn oil (1), Oil (1)
	June			Juice (6), Recipe (2), Cranberry juice (1), Salad (1)				Muffin (9), Recipe (1)		Blackcurrant (7), Plants (1)		Berry (3), Indian gooseberry (1), Shrub (1), Jam (1)				Recipe (7), Ketone (1), Cake (1), Calorie (1)		Vine (2), Plants (2), Shrub (1)		Buckthorn (6), Oil (1)
	July			Juice (7), Cranberry juice (2), Salad (1)				Muffin (9), Recipe (1)		Blackcurrant (10)		Recipe (3), Berry (2), Jam (2)		Berry (1)		Recipe (10)		Flower (3), Plants (2)		Buckthorn (6), Sea buckthorn oil (1), Oil (1)
	Aug.	Berry (1)		Juice (9), Recipe (1)				Muffin (6), Recipe (4)		Blackcurrant (6)		Berry (4), Jam (2), Shrub (1), Recipe (1)		Berry (1), Jam (1)		Recipe (9), Ketone (1)		Vine (2)		Buckthorn (5), Oil (1)
	Sep.	Recipe (1)		Juice (9), Cranberry juice (1)				Muffin (6), Recipe (4)		Blackcurrant (3)		Berry (2)				Muffin (4), Recipe (2), Cake (2), Tea (1), Ketone (1)				Buckthorn (6)
	Oct.	Berry (2), Recipe (1)		Sauce (7), Cranberry sauce (2), Recipe (1)		Blueberry (1)		Muffin (8), Recipe (2)		Blackcurrant (3), Redcurrant (1)						Recipe (5), Cake (1), Chocolate (1), Ketone (1), Raspberry ketone (1), Raspberry Pi (1)				Buckthorn (3), Oil (2)
	Nov.			Recipe (6), Juice (3), Cranberry juice (1)				Muffin (10)		Blackcurrant (3)		Indian gooseberry (1)				Recipe (4), Muffin (3), Ketone (2), Red raspberry leaf (1)				Buckthorn (4), Oil (2)
	Dec.	Berry (1)		Recipe (5), Sauce (3), Cranberry sauce (2)				Muffin (6), Recipe (4)		Blackcurrant (4)						Recipe (7), Chocolate (2), Cake (1)				Buckthorn (4), Sea buckthorn oil (1)
